# Supplementary material for: Systematic Review of Effectiveness of Chitosan as a Biofunctionalizer of Titanium Implants
Source: PubMed Central journal article supplement (PMC7912802; doi:10.3390/biology10020102), 2021-02-01
Supplement: biology-10-00102-s001.pdf [file biology-10-00102-s001.pdf]

**Supplementary materials:**

**Table S1.** Database search terms.

| <b>DATABASE</b>                 | <b>Search Terms</b>                                                                                                                                              |
|---------------------------------|------------------------------------------------------------------------------------------------------------------------------------------------------------------|
| <b>MEDLINE, CENTRAL, Pudmed</b> | “titanium”[MeSH Terms] AND “implant”[MeSH Terms]<br>AND “chitosan”[MeSH Terms] AND “coated materials,<br>biocompatible”[MeSH Terms] AND “animals”[MeSH<br>Terms] |
| <b>WOS</b>                      | titanium implants AND chitosan functionalized surface OR<br>chitosan coating surfaces AND in vivo                                                                |

MeSH, Medical Subject Headings.
